# Supplementary material for: The symbiotic relationship between Caenorhabditis elegans and members of its microbiome contributes to worm fitness and lifespan extension
Source: PubMed Central journal article supplement (PMC8136213; doi:10.1186/s12864-021-07695-y), 2021-05-19
Supplement: 12864_2021_7695_MOESM2_ESM.pdf [file 12864_2021_7695_MOESM2_ESM.pdf]

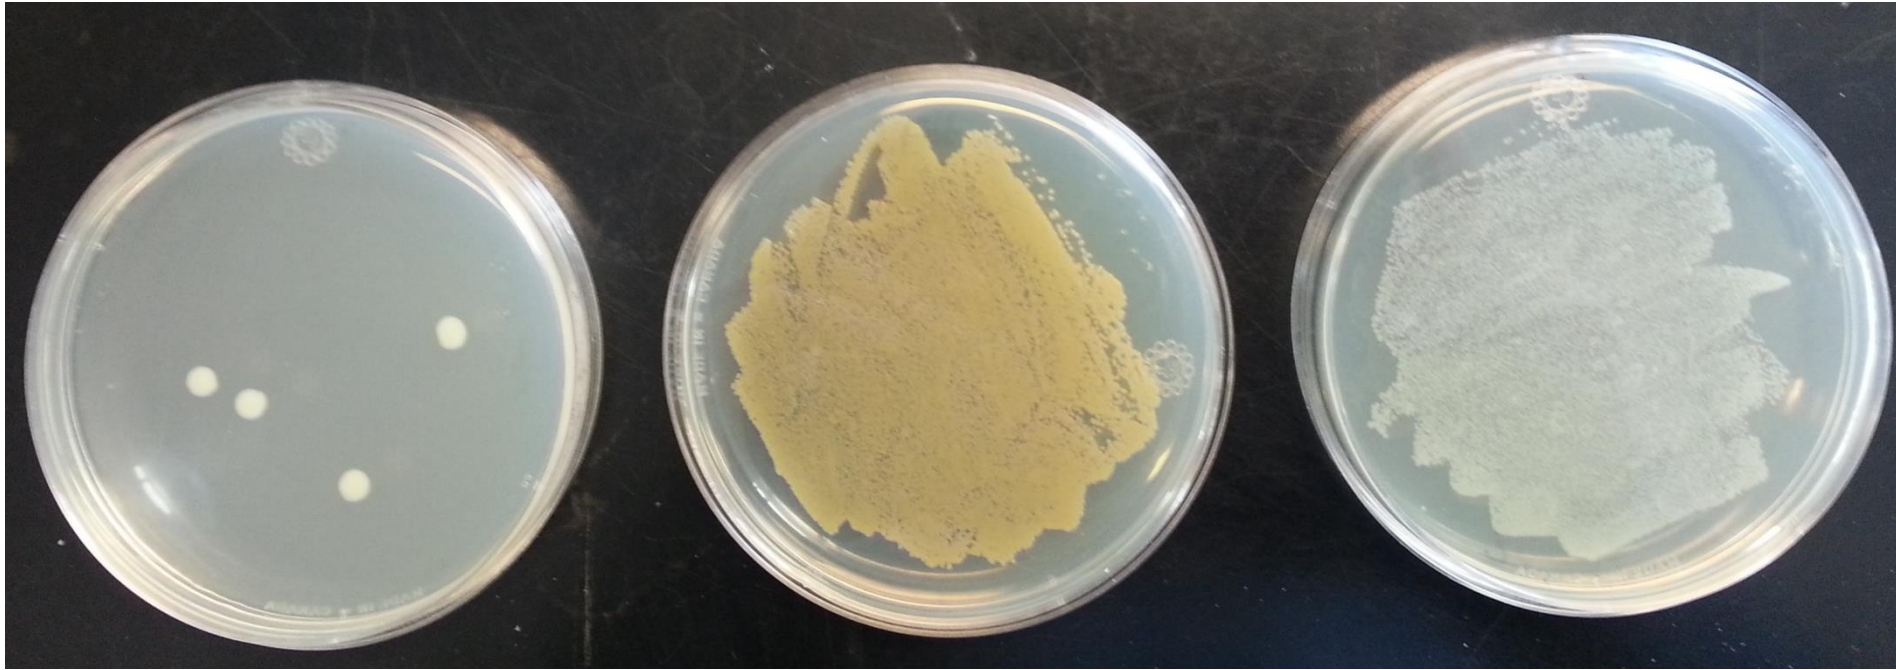

*Escherichia coli* OP50

*Chryseobacterium* sp. CHNTR56 MYb120

*Comamonas* sp. 12022 MYb131
