# Supplementary material for: The symbiotic relationship between Caenorhabditis elegans and members of its microbiome contributes to worm fitness and lifespan extension
Source: PubMed Central journal article supplement (PMC8136213; doi:10.1186/s12864-021-07695-y), 2021-05-19

a)

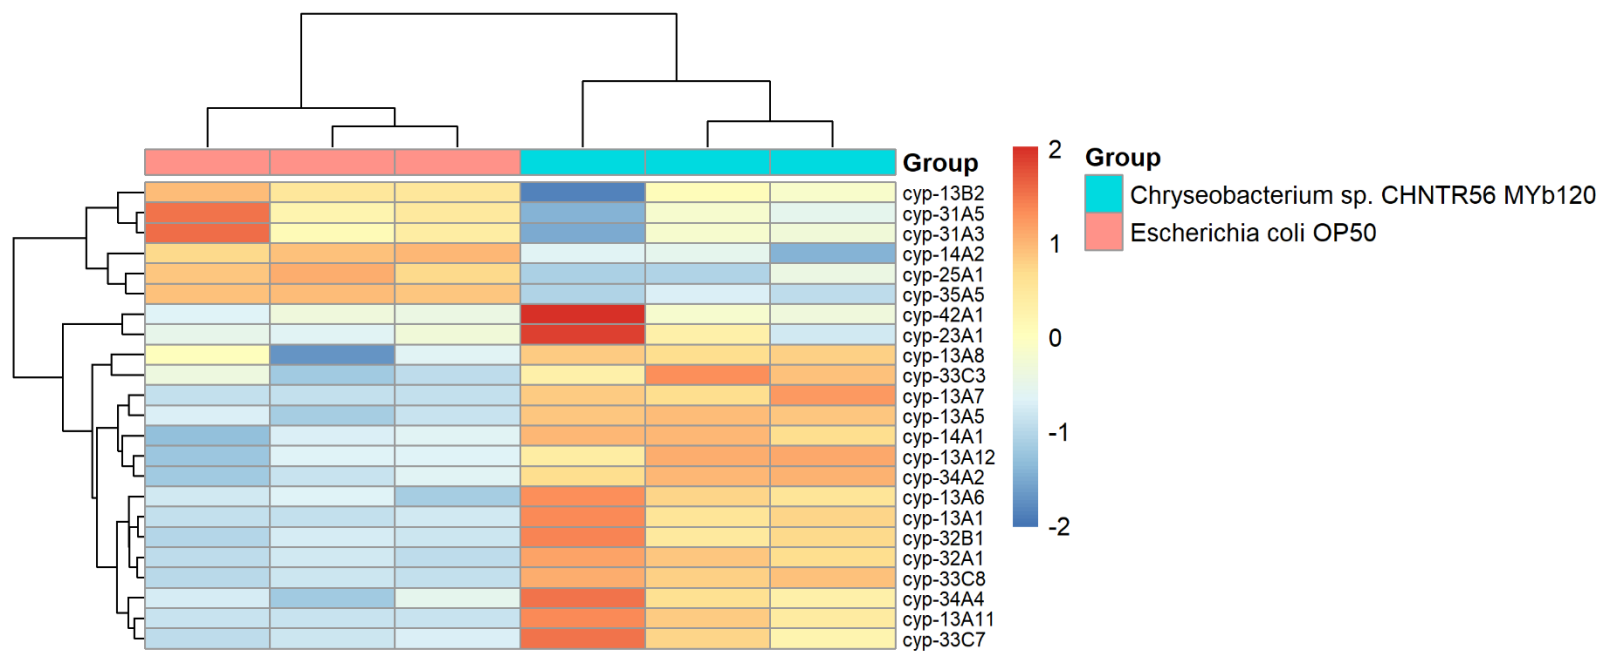

b)

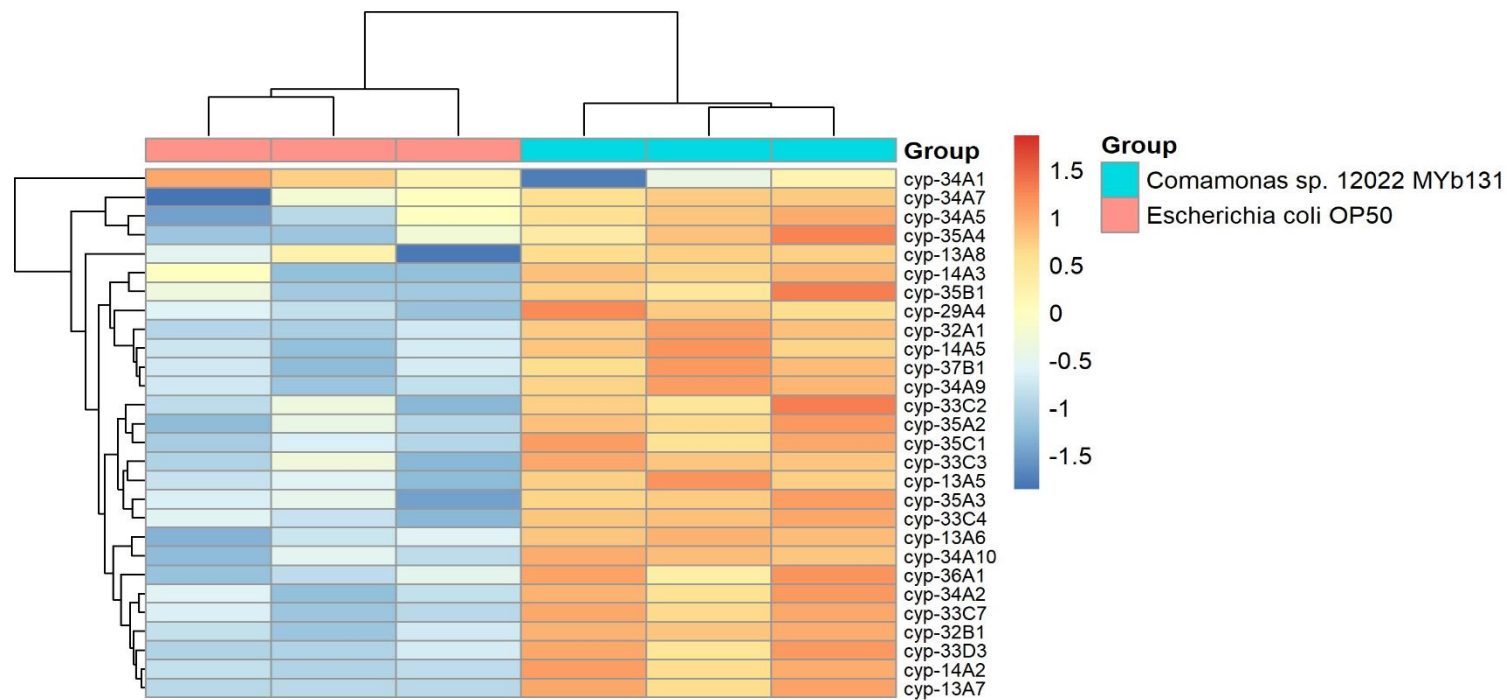

Supplement: 12864_2021_7695_MOESM5_ESM.pdf [file 12864_2021_7695_MOESM5_ESM.pdf]
